# Supplementary material
Source: PubMed Central journal article supplement (PMC6918773)
Supplement: joces-132-237271-s1.pdf [file joces-132-237271-s1.pdf]

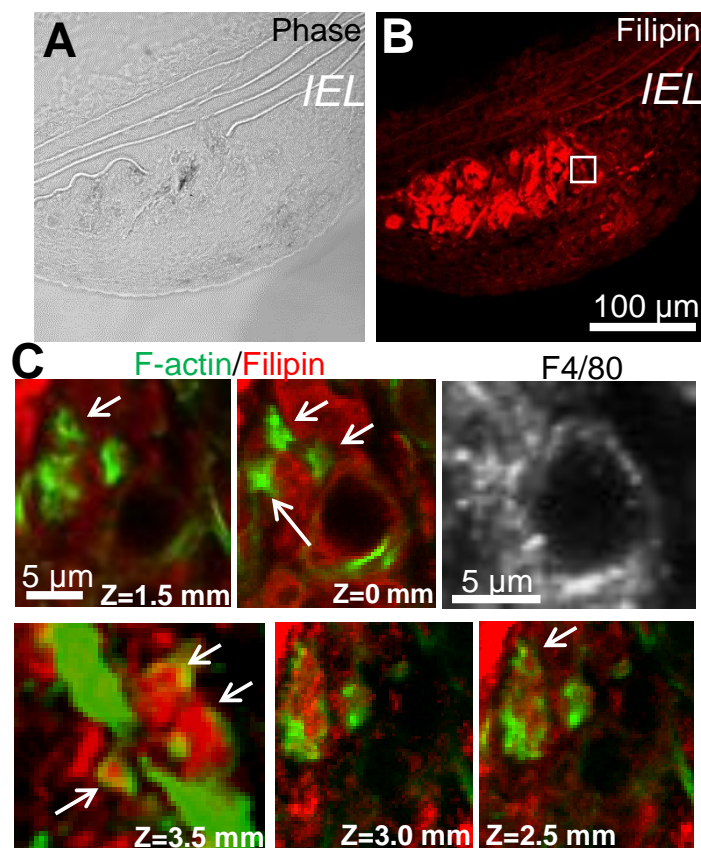

**Figure S1. Atherosclerotic lesion macrophages polymerize actin at contact sites with cholesterol rich deposits to form compartments similar to those observed *in vitro*.** (A-C) Aortic sections from hyperlipidemic *ApoE*<sup>-/-</sup> mice containing atherosclerotic plaque (A) were stained for free cholesterol using filipin (red) (B), F-actin using Alexa488-phalloidin (green) and for macrophages using F4/80 antibody (white) (C). Inset from white box in (B) shows a macrophage and arrows show actin polymerized at contact sites with cholesterol deposits through successive confocal slices of a z-stack. Internal elastic lamina (*IEL*) can be seen in (A-B).
